# Supplementary material
Source: PubMed Central journal article supplement (PMC6366668)
Supplement: NIHMS920862-supplement-ESI.pdf [file NIHMS920862-supplement-ESI.pdf]

# Supporting Information

## Anticancer potency of nitric oxide-releasing liposomes

*Dakota J. Suchyta and Mark H. Schoenfisch\**

Department of Chemistry, The University of North Carolina at Chapel Hill, Chapel Hill, North Carolina, 27599

\*To whom correspondence should be addressed: schoenfisch@unc.edu

### Table of Contents:

Figure S1: Molecular structures of the *N*-diazoniumdiolate NO donors.

Figure S2: Transmission electron micrographs of PAPA/NO and DETA/NO liposomes.

Figure S3: Cell viability assay of NO-releasing liposomes against HPNE cells.

Figure S4: Change in median fluorescence intensity over time after treating MCF-7 cells with liposomal and free PAPA/NO at various concentrations.

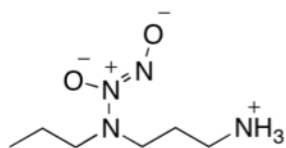

**PAPA/NO**

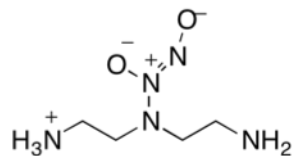

**DETA/NO**

**Figure S1.** Molecular structures of the *N*-diazoniumdiolate NO donors.

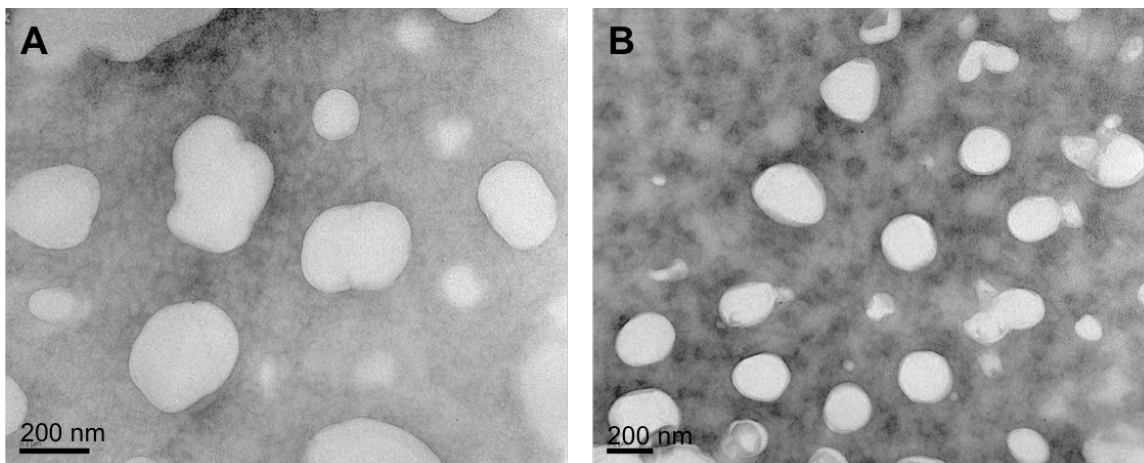

**Figure S2.** Transmission electron micrographs of (A) PAPA/NO and (B) DETA/NO liposomes.

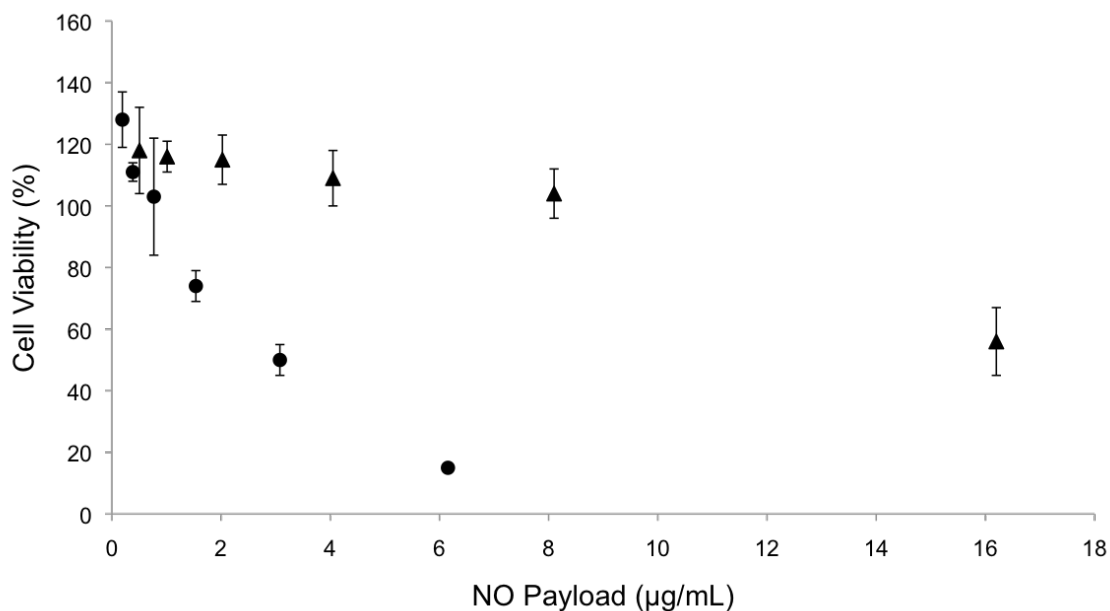

**Figure S3.** Cytotoxicity plot of liposomal (▲) PAPA/NO and (●) DETA/NO as a function of NO concentration against human HPNE epithelial pancreatic cells.

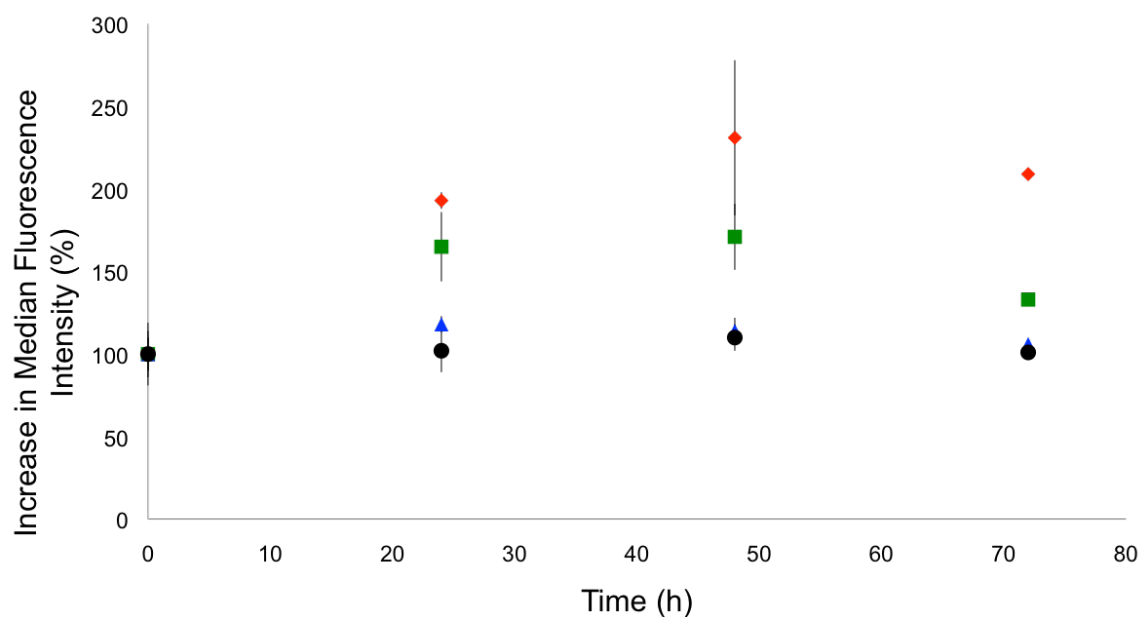

**Figure S4.** Change in median fluorescence intensity over time, as determined by flow cytometry, after treating MCF-7 cells with free PAPA/NO at 16.2 µg NO/mL (green squares) and 0.75 µg NO/mL (black circles), and liposomal PAPA/NO at 16.2 µg NO/mL (red diamonds) and 0.75 µg NO/mL (blue triangles).
